# Supplementary material
Source: MDPI journal article supplement (https://www.mdpi.com/2073-4395/13/4/1176)
Supplement: s1 [file s1]

## Supplementary Material

Table S1. Effect of fertilizer treatment (RA = Raw dairy slurry; AC = Acidified dairy slurry; AL = Alkalinized dairy slurry; NE = Neutralized dairy slurry; MN = Mineral fertilizer; CT: Control) and time after fertilizer application (3, 10 and 17 days) showed by a two-way ANOVA for volumes leached (L). Different letters in the mean volumes leached (n=4) indicate significant differences based on Tukey test ( $p < 0.05$ ).

| Treatment | Time after fertilizer application (d) | Volume leached (L)      |
|-----------|---------------------------------------|-------------------------|
| RA        | 3                                     | $0,196 \pm 0,004^{ab}$  |
|           | 10                                    | $0,169 \pm 0,011^c$     |
|           | 17                                    | $0,169 \pm 0,004^c$     |
| AC        | 3                                     | $0,195 \pm 0,004^{ab}$  |
|           | 10                                    | $0,169 \pm 0,007^c$     |
|           | 17                                    | $0,169 \pm 0,002^c$     |
| AL        | 3                                     | $0,198 \pm 0,007^a$     |
|           | 10                                    | $0,171 \pm 0,016^c$     |
|           | 17                                    | $0,169 \pm 0,015^c$     |
| NE        | 3                                     | $0,202 \pm 0,002^a$     |
|           | 10                                    | $0,185 \pm 0,005^{abc}$ |
|           | 17                                    | $0,184 \pm 0,001^{abc}$ |
| MN        | 3                                     | $0,197 \pm 0,003^{ab}$  |
|           | 10                                    | $0,184 \pm 0,006^{abc}$ |
|           | 17                                    | $0,176 \pm 0,007^{bc}$  |
| CT        | 3                                     | $0,197 \pm 0,005^{ab}$  |
|           | 10                                    | $0,171 \pm 0,012^c$     |
|           | 17                                    | $0,168 \pm 0,014^c$     |
